# Supplementary material
Source: HighWire-hosted journal article supplement (doi:10.1101/rna.078793.121)

A

|                  | # of genes | # of sites |
|------------------|------------|------------|
| QuantSeq rep 1   | 3716       | 4298       |
| QuantSeq rep 2   | 3738       | 4306       |
| QuantSeq overlap | 3558       | 4126       |
| ONT validation   | 2630       | 2764       |

B

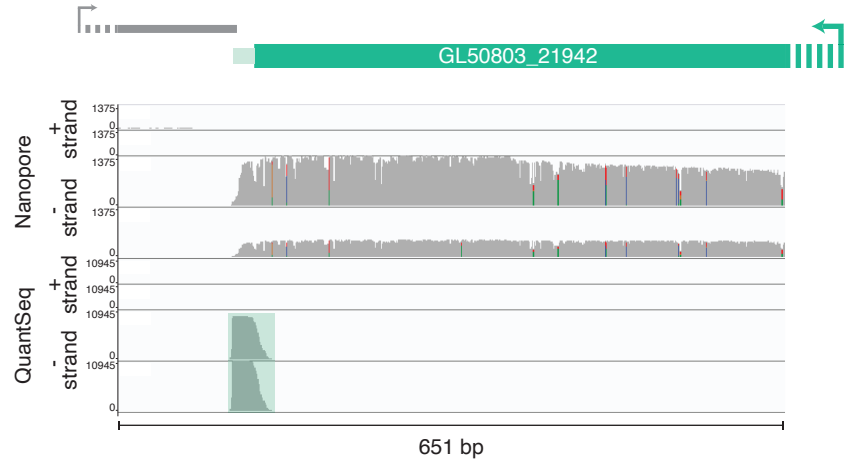

Supplement: Supplemental_Figure_S1.pdf [file Supplemental_Figure_S1.pdf]
