# Supplementary material
Source: HighWire-hosted journal article supplement (doi:10.1101/rna.078793.121)

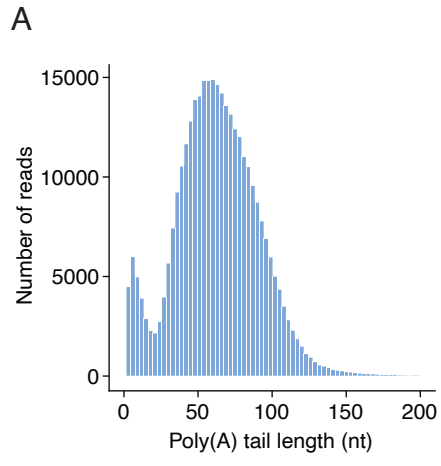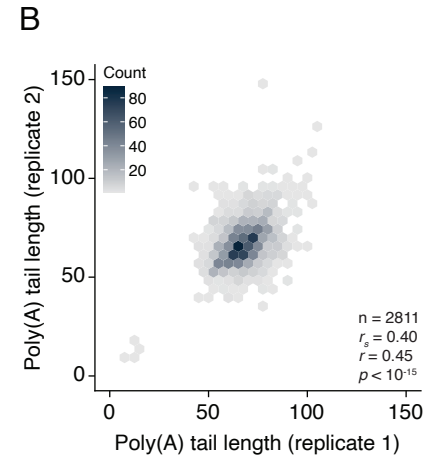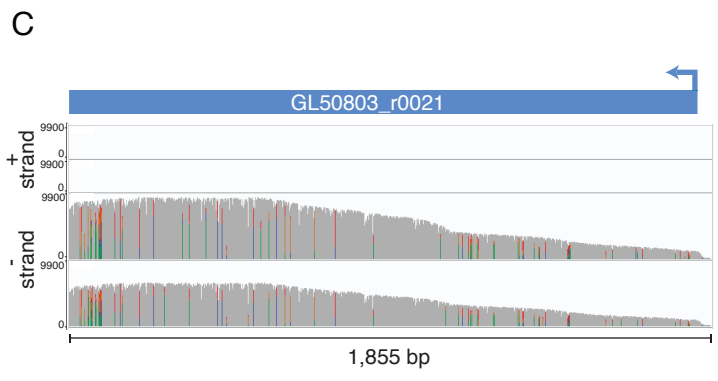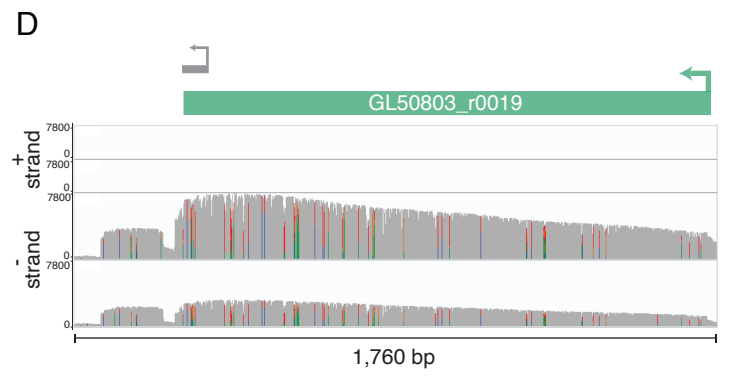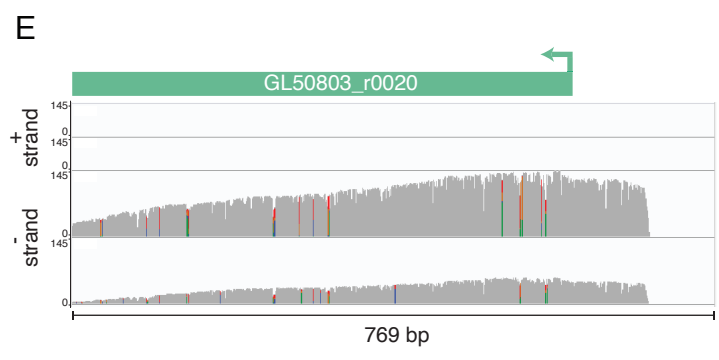

Supplement: Supplemental_Figure_S2.pdf [file Supplemental_Figure_S2.pdf]
