# Supplementary material
Source: HighWire-hosted journal article supplement (doi:10.1101/rna.078793.121)

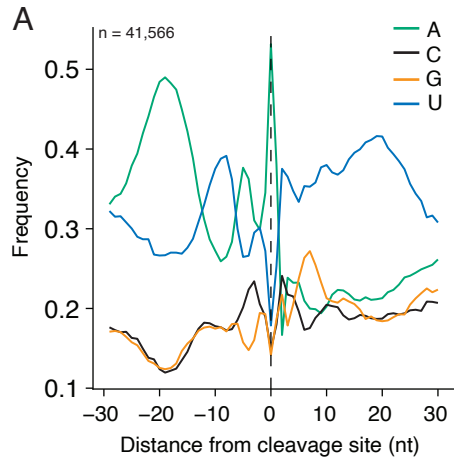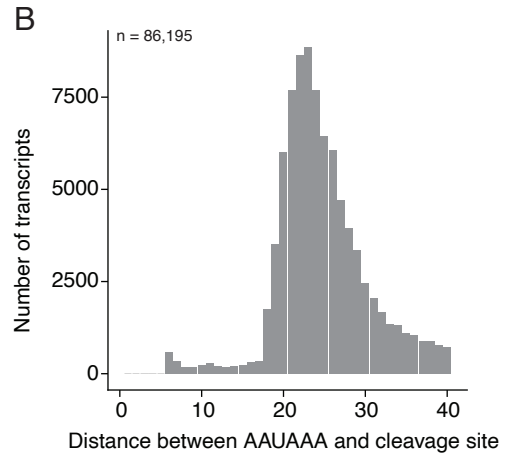

Supplement: Supplemental_Figure_S3.pdf [file Supplemental_Figure_S3.pdf]
