# Supplementary material
Source: HighWire-hosted journal article supplement (doi:10.1101/rna.078793.121)

A

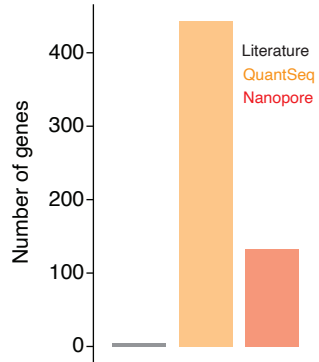

B

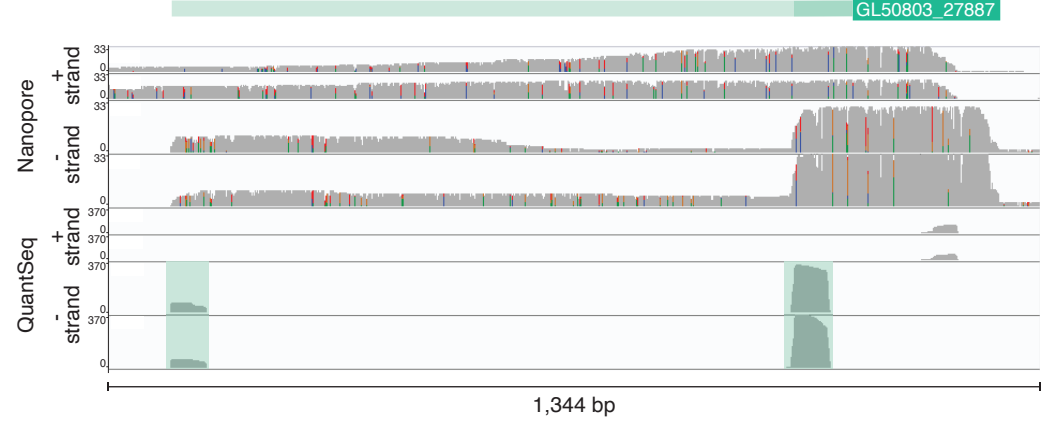

C

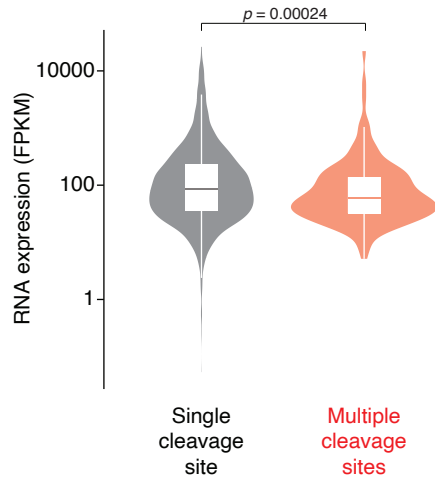

D

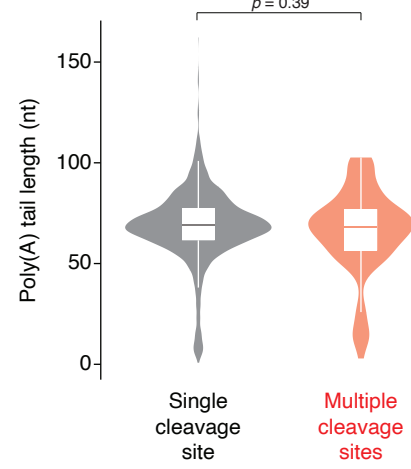

Supplement: Supplemental_Figure_S4.pdf [file Supplemental_Figure_S4.pdf]
